# Supplementary material for: Use of Echocardiography and Heart Failure In-Hospital Mortality from Registry Data in Japan
Source: MDPI journal article supplement (doi:10.3390/jcdd8100124), 2021-09-30
Supplement: s1 [file s1]

**Supplemental Table S1: Baseline patient characteristics.**

|                       | All      | 1 <sup>st</sup> tertile | 2 <sup>nd</sup> tertile | 3 <sup>rd</sup> tertile |
|-----------------------|----------|-------------------------|-------------------------|-------------------------|
| Number of patients    | 80,496   | 15,975                  | 24,991                  | 39,530                  |
| Age (year)            | 78±13    | 81±12                   | 78±13                   | 77±13                   |
| Male (%)              | 53.6     | 49.4                    | 53.4                    | 55.5                    |
| BMI                   | 22.8±5.2 | 22.5±4.9                | 22.8±4.7                | 22.8±5.6                |
| NYHA I-II (%)         | 41.4     | 41                      | 39.5                    | 42.8                    |
| Complication (%)      |          |                         |                         |                         |
| HT                    | 51.3     | 46.9                    | 53.0                    | 52.0                    |
| DM                    | 26.8     | 25.1                    | 27.2                    | 27.2                    |
| DL                    | 17.6     | 12.1                    | 16.9                    | 20.3                    |
| MI                    | 9.8      | 8.2                     | 9.7                     | 10.5                    |
| Af                    | 34.3     | 33.8                    | 35.0                    | 34.2                    |
| PVD                   | 3.9      | 3.4                     | 3.7                     | 4.2                     |
| Stroke                | 7.8      | 10.5                    | 8.1                     | 6.5                     |
| Dementia              | 5.5      | 7.1                     | 5.7                     | 4.7                     |
| COPD                  | 7.0      | 8.6                     | 7.0                     | 6.5                     |
| Liver disease         | 0.1      | 0.2                     | 0.1                     | 0.1                     |
| CKD                   | 14.5     | 14.3                    | 14.2                    | 14.7                    |
| Cancer                | 10.8     | 11.3                    | 10.8                    | 10.6                    |
| Treatment (%)         |          |                         |                         |                         |
| HD                    | 5.0      | 4.3                     | 4.7                     | 5.5                     |
| Artificial respirator | 19.3     | 13.4                    | 18.8                    | 22                      |
| IABP                  | 0.9      | 0.4                     | 0.6                     | 1.3                     |
| PCPS                  | 0.1      | 0.02                    | 0.1                     | 0.2                     |
| Inotropes             | 12.0     | 12.4                    | 11.6                    | 12.1                    |
| PCI                   | 4.7      | 3.5                     | 4.8                     | 5.2                     |
| TTE                   | 73.2     | 72.1                    | 72.7                    | 73.9                    |

Data are presented as percentage of patients. Abbreviations; BMI, body mass index;

NYHA, New York heart association functional class; HT, hypertension, DM, diabetes

mellitus, DL, dyslipidemia, MI, myocardial infarction; Af, atrial fibrillation; PVD,

peripheral vascular disease; COPD, chronic obstructive pulmonary disease; CKD,

chronic kidney disease; HD, hemodialysis, IABP, intra-aortic balloon pumping; PCPS, percutaneous cardiopulmonary system; PCI, percutaneous coronary intervention; TTE, transthoracic echocardiogram.
